# Supplementary material
Source: PubMed Central journal article supplement (PMC6314470)
Supplement: NIHMS80378-supplement-Supplemental_Material.pdf [file NIHMS80378-supplement-Supplemental_Material.pdf]

**Supplemental Material****Supplemental figures**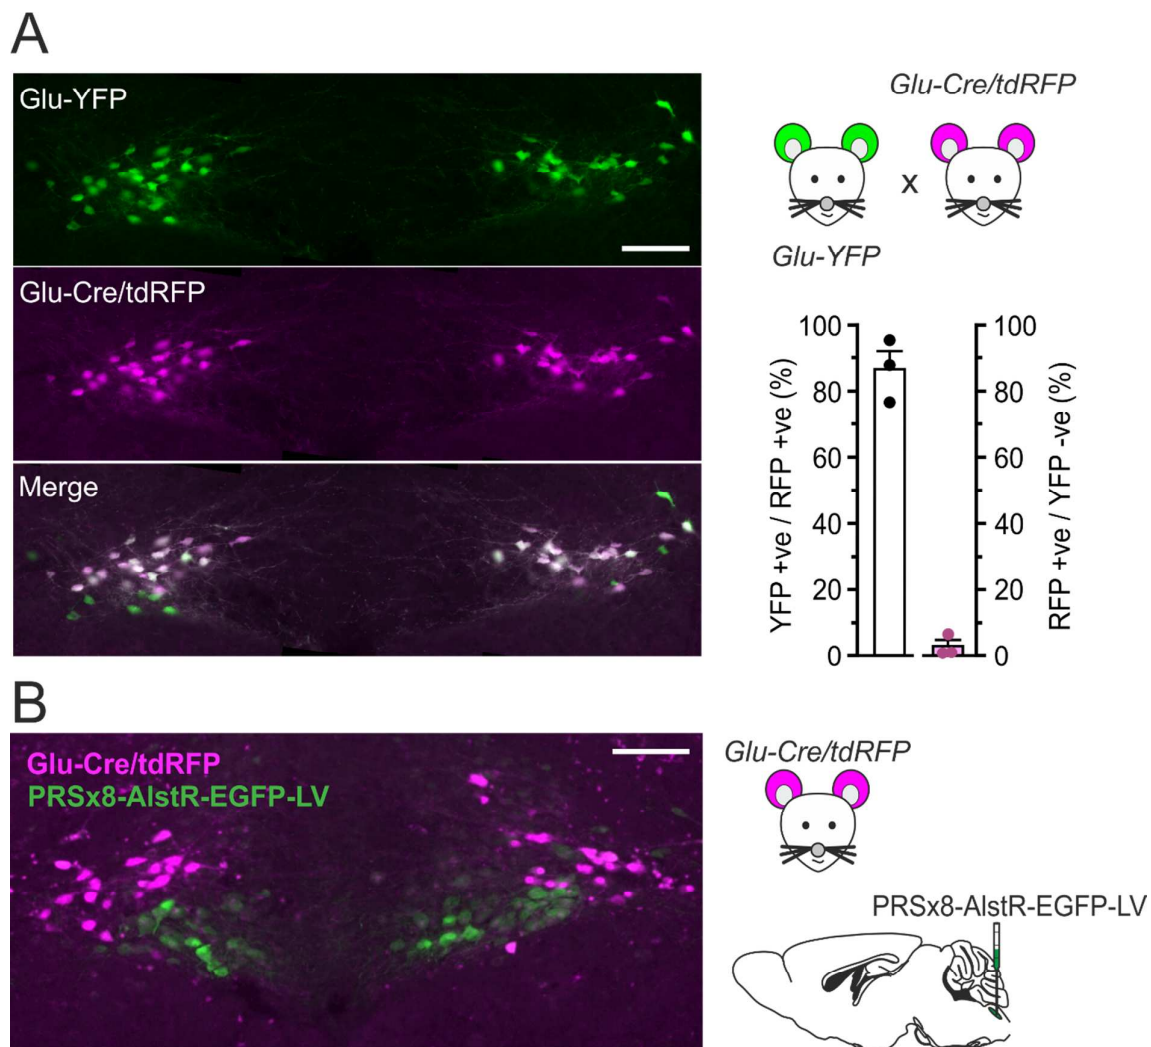

**Supplemental figure 1 – related to Fig 1. RFP-positive Glu-Cre cells overlap with Glu-YFP cells, but not Phox2b-expressing cells.**

(A) GFP- and RFP-immunoreactivity in the NTS of the result of crossbreeding Glu-YFP and Glu-Cre/tdRFP mice, demonstrating clear overlap between these neuronal populations. Scale: 100  $\mu$ m. Right panel: Percentage of RFP-positive cells also expressing YFP (left) as well as RFP-positive cells *not* expressing YFP (right) throughout the NTS. Data given as mean $\pm$ SEM, n=3 mice. (B) RFP-immunoreactivity and Phox2b-dependent expression of EGFP in the NTS of Glu-Cre/tdRFP mice injected with PRX8-AlstR-EGFP-LV. Scale: 100  $\mu$ m. N=3 mice.

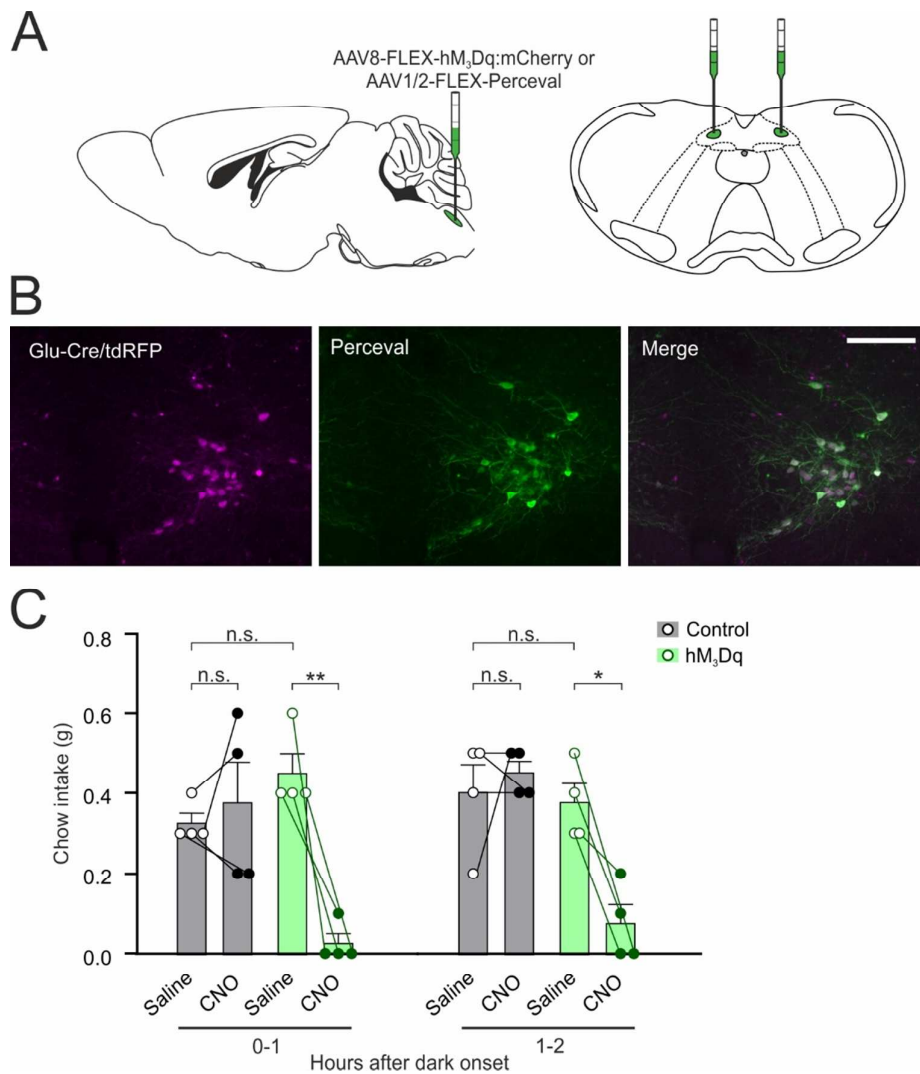

**Supplemental figure 2 – related to Fig 1. hM<sub>3</sub>Dq lacks intrinsic activity on food intake.**

(A) Schematic showing injection of AAV2-FLEX-hM<sub>3</sub>Dq:mCherry or AAV1/2-FLEX-Perceval into the NTS of Glu-Cre mice. (B) Expression of tdRFP and Perceval (detected with an anti-GFP antibody). Scale: 100  $\mu$ m. (C) Non-cumulative chow intake of Glu-Cre mice expressing Perceval or hM<sub>3</sub>Dq in the first two hours after dark onset following injection of 2 mg/kg CNO i.p. 30 mins prior to dark onset. Data given as mean $\pm$ SEM, n=4 (Control), n=4 (hM<sub>3</sub>Dq). There was a significant virus  $\times$  drug interaction at both hour 0-1 ( $F(1, 6)=17.19$ ,  $p=0.006$ ) and hour 1-2 ( $F(1, 6)=8.65$ ,  $p=0.026$ ) and a significant effect of CNO in the hM<sub>3</sub>Dq group in hour 0-1 ( $p=0.0038$ ) and in hour 1-2 ( $p=0.024$ ), but no effect of CNO in the control group in hour 0-1 ( $p=0.81$ ) or hour 1-2 ( $p=0.82$ ) (Sidak's multiple comparisons test). \*:  $p<0.05$ ; \*\*:  $p<0.01$ ; n.s.: not significant.

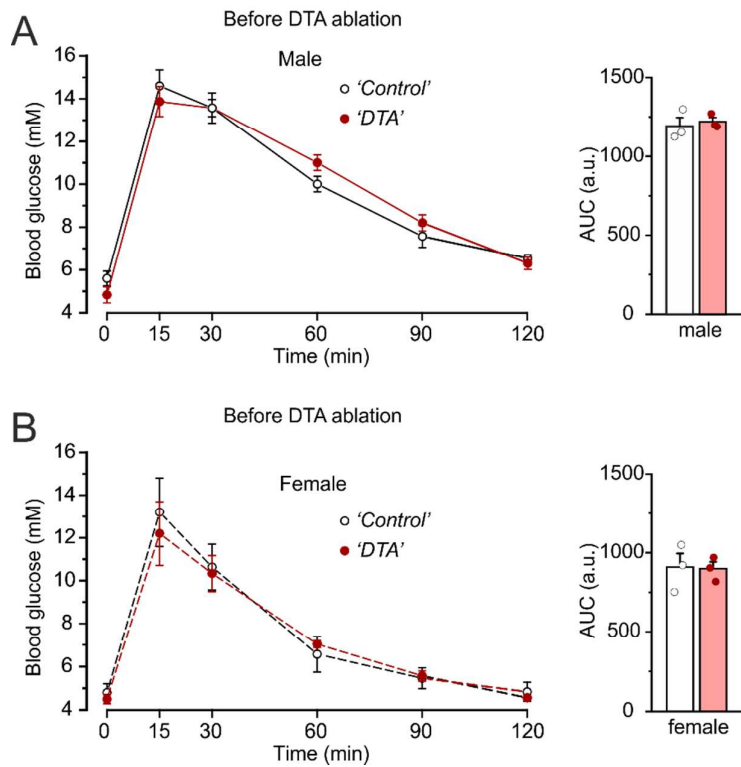

**Supplemental figure 3 – related to Fig 3. Glucose tolerance before PPG ablation.**

(A-B) Blood glucose in response to an i.p. injection of glucose (1 g/kg) at t=0 prior to stereotaxic injection of -DTA or control virus in six male (A) and six female (B) Glu-Cre mice. Area under the curve (AUC) of the i.p. glucose tolerance test for each group is given on the right of each graph. Data given as mean±SEM.

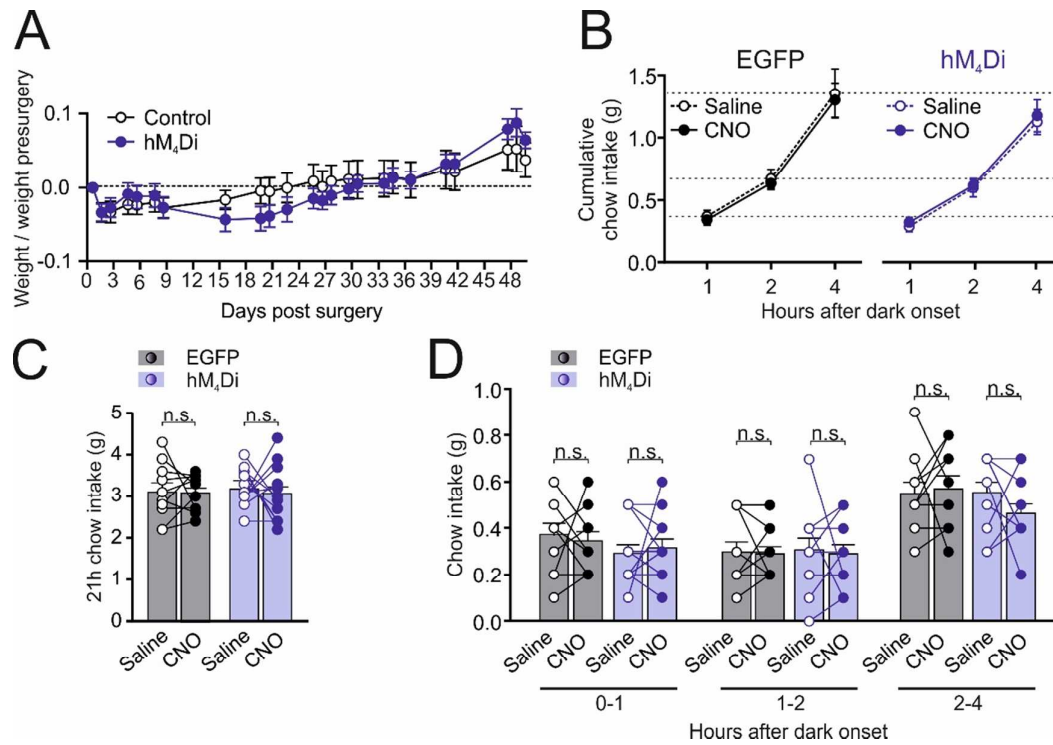

**Supplemental figure 4 – related to Fig 4. hM<sub>4</sub>Di lacks intrinsic activity on body weight and food intake.**

(A) Change in bodyweight following stereotaxic injection of AAV2-FLEX-hM<sub>4</sub>Di (n=13) or AAV2-FLEX-EGFP (n=11, control). There was a significant virus × time interaction ( $F(23, 506)=2.93$ ,  $p=0.0001$ ), but no significant difference between groups at any timepoint (Sidak's multiple comparisons test). (B-D) Cumulative (B-C) and non-cumulative (D) chow intake in the first four hours (B,D) and 21 hours (C) after dark onset. Mice were expressing either hM<sub>4</sub>Di or EGFP in NTS PPG neurons and were injected with 2 mg/kg CNO i.p. 30 mins prior to dark onset. Data given as mean±SEM, n=11 (control), n=12 (hM<sub>4</sub>Di). B: There was no significant drug × time interaction for either the control ( $F(2, 20)=0.086$ ,  $p=0.92$ ) or hM<sub>4</sub>Di group ( $F(2, 22)=0.036$ ,  $p=0.96$ ), and there was no significant main effect of CNO in the control ( $F(1, 10)=0.22$ ,  $p=0.65$ ) or in the hM<sub>4</sub>Di group ( $F(1, 11)=0.11$ ,  $p=0.74$ ). C: There was no significant drug × virus interaction ( $F(1, 20)=0.22$ ,  $p=0.65$ ) and no main effect of CNO ( $F(1, 20)=0.47$ ,  $p=0.5$ ) or virus ( $F(1, 20)=0.11$ ,  $p=0.75$ ). D: No significant drug × virus interactions (Hour 0-1: ( $F(1, 21)=0.18$ ,  $p=0.67$ ), hour 1-2: ( $F(1, 21)=0.011$ ,  $p=0.92$ ), and hours 2-4 ( $F(1, 19)=1.30$ ,  $p=0.27$ )). n.s.: not significant.
